# Supplementary material for: Inside the ensemble: unlocking the potential of one-at-a-time experiments with lab-on-a-chip automation
Source: Royal Society of Chemistry journal article supplement (doi:10.1039/d1lc00601k), 2021-01-01
Supplement: d1lc00601k3.pdf [file d1lc00601k3.pdf]

|                                                  |                                                        |                                                |                          |
|--------------------------------------------------|--------------------------------------------------------|------------------------------------------------|--------------------------|
| Sample Source & type:<br>Sample bulk lot ref:    | Measured by:<br>broomean<br>Result Source:<br>Averaged |                                                |                          |
| Particle Name:<br>Corn Oil                       | Accessory Name:<br>Hydro 20005 (A)                     | Analysis model:<br>General purpose (spherical) | Sensitivity:<br>Enhanced |
| Particle Rf:<br>1.470                            | Absorption:<br>0                                       | Size range:<br>0.020 to 2000.000 um            | Obsouration:<br>14.87 %  |
| Dispersant Name:<br>Water                        | Dispersant Rf:<br>1.330                                | Weighted Residual:<br>1.150 %                  | Result Emulation:<br>Off |
| Concentration:<br>0.0048 %Vol                    | Span I:<br>2.270                                       | Uniformity:<br>0.692                           | Result units:<br>Volume  |
| Specific Surface Area:<br>6.24 m <sup>2</sup> /g | Surface Weighted Mean D[3,2]:<br>0.962 um              | Vol. Weighted Mean D[4,3]:<br>2.016 um         |                          |
| d(0.1): 0.383 um                                 |                                                        | d(0.5): 1.651 um                               |                          |
|                                                  |                                                        | d(0.9): 4.130 um                               |                          |

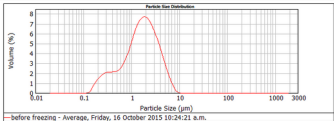

| Size (µm) | Volume in % |
|-----------|-------------|
| 0.010     | 0.00        |
| 0.011     | 0.00        |
| 0.012     | 0.00        |
| 0.014     | 0.00        |
| 0.016     | 0.00        |
| 0.017     | 0.00        |
| 0.020     | 0.00        |
| 0.022     | 0.00        |
| 0.025     | 0.00        |
| 0.030     | 0.00        |
| 0.035     | 0.00        |
| 0.040     | 0.00        |
| 0.046     | 0.00        |
| 0.052     | 0.00        |
| 0.060     | 0.00        |
| 0.068     | 0.00        |
| 0.079     | 0.00        |
| 0.091     | 0.00        |
| 0.105     | 0.00        |

| Size (µm) | Volume in % |
|-----------|-------------|
| 0.128     | 0.00        |
| 0.150     | 0.04        |
| 0.176     | 0.30        |
| 0.202     | 0.78        |
| 0.229     | 1.18        |
| 0.269     | 1.83        |
| 0.310     | 2.70        |
| 0.354     | 3.86        |
| 0.401     | 5.41        |
| 0.479     | 7.92        |
| 0.559     | 11.44       |
| 0.621     | 16.17       |
| 0.724     | 23.57       |
| 0.832     | 34.89       |
| 0.968     | 51.75       |
| 1.098     | 75.75       |

| Size (µm) | Volume in % |
|-----------|-------------|
| 1.266     | 9.88        |
| 1.329     | 16.26       |
| 1.445     | 24.70       |
| 1.602     | 36.84       |
| 1.805     | 53.83       |
| 2.058     | 78.65       |
| 2.312     | 112.23      |
| 2.684     | 163.80      |
| 3.211     | 238.84      |
| 3.822     | 342.22      |
| 4.383     | 497.98      |
| 5.012     | 724.24      |
| 5.754     | 1051.98     |
| 6.627     | 1521.83     |
| 7.598     | 2181.41     |
| 8.710     | 3151.09     |
| 10.000    | 4521.00     |
| 11.482    | 6521.00     |

| Size (µm) | Volume in % |
|-----------|-------------|
| 11.482    | 0.00        |
| 13.150    | 0.00        |
| 15.136    | 0.00        |
| 17.276    | 0.00        |
| 19.692    | 0.00        |
| 22.508    | 0.00        |
| 25.722    | 0.00        |
| 30.200    | 0.00        |
| 34.678    | 0.00        |
| 39.811    | 0.00        |
| 45.738    | 0.00        |
| 52.451    | 0.00        |
| 60.226    | 0.00        |
| 69.150    | 0.00        |
| 79.433    | 0.00        |
| 91.201    | 0.00        |
| 104.713   | 0.00        |
| 120.226   | 0.00        |

| Size (µm) | Volume in % |
|-----------|-------------|
| 120.226   | 0.00        |
| 138.208   | 0.00        |
| 158.689   | 0.00        |
| 181.972   | 0.00        |
| 208.600   | 0.00        |
| 238.880   | 0.00        |
| 273.420   | 0.00        |
| 312.226   | 0.00        |
| 365.078   | 0.00        |
| 423.889   | 0.00        |
| 498.630   | 0.00        |
| 581.541   | 0.00        |
| 683.857   | 0.00        |
| 804.426   | 0.00        |
| 943.794   | 0.00        |
| 1104.478  | 0.00        |
| 1298.626  | 0.00        |

| Size (µm) | Volume in % |
|-----------|-------------|
| 1518.621  | 0.00        |
| 1745.440  | 0.00        |
| 1995.397  | 0.00        |
| 2278.811  | 0.00        |
| 2697.762  | 0.00        |
| 3151.088  | 0.00        |
| 3643.032  | 0.00        |
| 4271.211  | 0.00        |
| 5047.884  | 0.00        |
| 5978.108  | 0.00        |
| 7071.873  | 0.00        |
| 8454.398  | 0.00        |
| 10088.834 | 0.00        |
| 12058.776 | 0.00        |
| 14428.638 | 0.00        |
| 17222.000 | 0.00        |
