# Supplementary figures and images for: Inside the ensemble: unlocking the potential of one-at-a-time experiments with lab-on-a-chip automation
Source: Royal Society of Chemistry journal article supplement (doi:10.1039/d1lc00601k), 2021-01-01

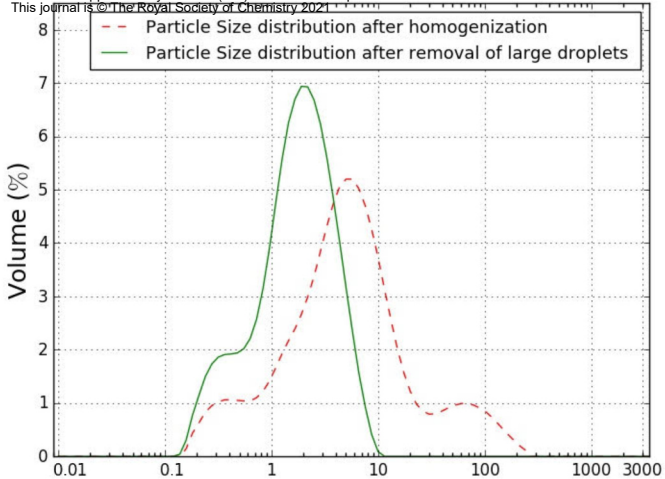

Supplement: d1lc00601k2.pdf [file d1lc00601k2.pdf]
